# Supplementary material for: Mussel-inspired polydopamine coating as a versatile platform for synthesizing polystyrene/Ag nanocomposite particles with enhanced antibacterial activities
Source: Royal Society of Chemistry journal article supplement (doi:10.1039/c4tb00460d), 2014-01-01
Supplement: c4tb00460d1.pdf [file c4tb00460d1.pdf]

## Electronic Supplementary Information

### **Mussel-inspired polydopamine coating as a versatile platform for synthesizing polystyrene/Ag nanocomposite particles with enhanced antibacterial activities**

Ying Cong, <sup>§a</sup> Tian Xia, <sup>§b</sup> Miao Zou, <sup>§b</sup> Zhenni Li, <sup>a</sup> Bo Peng, <sup>\*c</sup> Dingzong Guo<sup>\*b</sup> and  
Ziwei Deng<sup>\*a</sup>

<sup>a</sup> School of Materials Science and Engineering, Shaanxi Normal University, Xi'an, 710062, China

<sup>b</sup> College of Veterinary Medicine, Huazhong Agricultural University, Wuhan, 430070, China

<sup>c</sup> Soft Condensed Matter, Debye Institute for NanoMaterials Science, Utrecht University,  
Princetonplein 5, 3584 CC, Utrecht, the Netherlands

<sup>§</sup> These three authors contributed equally to this work.

<sup>\*</sup> Dr. Ziwei Deng Tel: +86-29-81530804. Fax: +86-29-81530702. E-mail: zwdeng@snnu.edu.cn

Prof. Dingzong Guo Tel: +86-27-87285859. Fax: +86-27-87280408. E-mail: hlgdz@163.com

Dr. Bo Peng Tel: +31-30-253320. Fax: +31-30-2532706. Email: b.peng@uu.nl

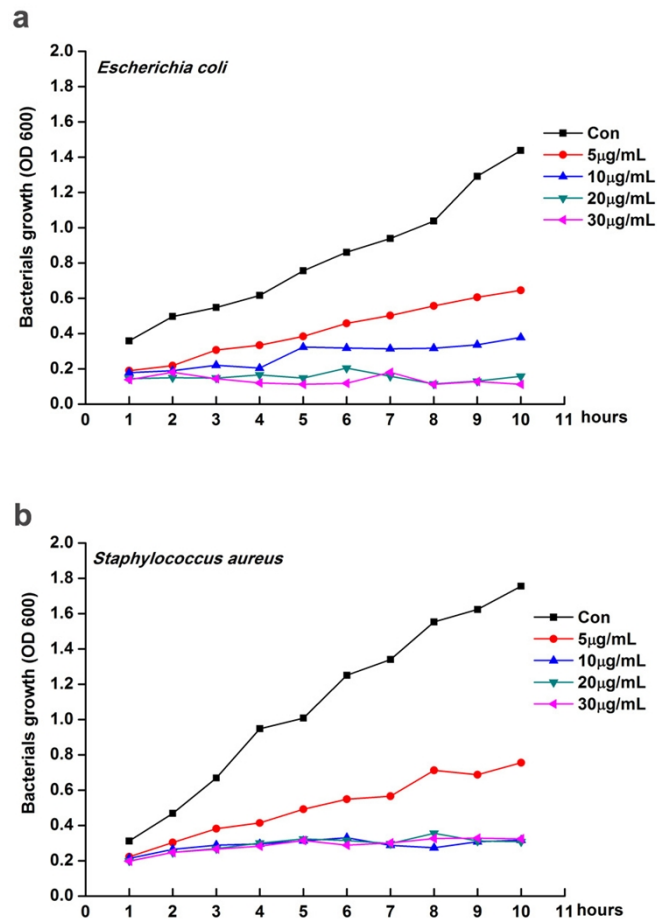

**Fig.S1** Bacterial growth curves in LB media with kanamycin. Different concentrations of kanamycin were added to the culture of *Escherichia coli* (a) and *Staphylococcus aureus* (b). The growth of the bacteria was measured by a judgment of the O.D. at the wavelength of 600 nm. The initial addition of the kanamycin to the LB bacterium suspension was regarded as the starting point.
